# Supplementary material for: Bioplastics for a circular economy
Source: Springer Nature journal article supplement (doi:10.1038/s41578-021-00407-8), 2022-01-20
Supplement: 41578_2021_407_MOESM1_ESM.pdf [file 41578_2021_407_MOESM1_ESM.pdf]

**Supplementary information**

---

**Bioplastics for a circular economy**

---

In the format provided by the  
authors and unedited

**Supplementary Information for  
Bioplastics for a circular economy**

Jan-Georg Rosenboom<sup>1,2,3</sup>, Robert Langer<sup>1,2†</sup> and Giovanni Traverso<sup>2,3,4†</sup>

<sup>1</sup>Department of Chemical Engineering, Massachusetts Institute of Technology, Cambridge, MA, USA.

<sup>2</sup>Koch Institute for Integrative Cancer Research, Massachusetts Institute of Technology, Cambridge, MA, USA.

<sup>3</sup>Division of Gastroenterology, Brigham and Women's Hospital, Harvard Medical School, Boston, MA, USA.

<sup>4</sup>Department of Mechanical Engineering, Massachusetts Institute of Technology, Cambridge, MA, USA.

†e-mail: rlander@mit.edu; cgt20@mit.edu

**Table S1 | Comparison of material properties of some commercially relevant synthetic fossil-based and bio-based polymers**

| Polymer                            | $T_m$<br>(°C) | $T_g$<br>(°C) | Tensile strength<br>(MPa) | Young's modulus<br>(GPa) | Elongation<br>(%) |
|------------------------------------|---------------|---------------|---------------------------|--------------------------|-------------------|
| <b>Fossil-based and durable</b>    |               |               |                           |                          |                   |
| HDPE <sup>1,2</sup>                | 130           | >-70          | 45                        | >1                       | 640               |
| LDPE <sup>1,2</sup>                | 110           | -100          | 20                        | 0.25                     | 500               |
| PP <sup>2,3</sup>                  | <175          | -10           | 35                        | <17                      | >200              |
| PS <sup>4,2</sup>                  | 240           | 100           | 42                        | 3.6                      | 5                 |
| PET <sup>1,5</sup>                 | 245           | 75            | 58                        | 3.1                      | >300              |
| PVC <sup>4,6</sup>                 | 100           | <115          | 58                        | 2.8                      | 5                 |
| <b>Fossil-based and degradable</b> |               |               |                           |                          |                   |
| PBAT <sup>1</sup>                  | 120           | -33           | 23                        | 0.08                     | 470               |
| PBS <sup>1,7,8</sup>               | 115           | -32           | 33                        | 0.6                      | >170              |
| PVA <sup>9</sup>                   | 230           | 80            | 46                        | 1.8                      | NA                |
| PCL <sup>1,10,11</sup>             | 60            | -60           | 23                        | 0.4                      | 600               |
| <b>Bio-based and durable</b>       |               |               |                           |                          |                   |
| PEF <sup>12,5,13</sup>             | 220           | 85            | 76                        | 1.9                      | >100              |
| bioPET                             | same as PET   |               |                           |                          |                   |
| bioPE                              | same as PE    |               |                           |                          |                   |
| <b>Bio-based and degradable</b>    |               |               |                           |                          |                   |
| bioPBS                             | same as PBS   |               |                           |                          |                   |
| PLA <sup>1,2</sup>                 | 160           | 50            | 65                        | 3.8                      | 4                 |
| PGA <sup>2,6</sup>                 | 225           | 40            | >80                       | 8.4                      | 30                |
| P3HB <sup>14,3,15</sup>            | 175           | 2.5           | 25                        | 2.8                      | 5                 |
| P4HB <sup>16,2,17</sup>            | 60            | -51           | >50                       | 0.07                     | 1,000             |

Degradable polymers describe those that contain readily hydrolysable aliphatic ester bonds in their backbone structure, and PVA whose degradation follows a diketone pathway. Durable polymers are those with a backbone that is typically more resistant to enzymatic and non-enzymatic hydrolysis, such as aromatic esters, amides and C-C bonds. Note that non-zero degradation may occur in any polymer. The listed material properties are taken from various references where available and, therefore, must be considered indications of typical values in common applications, but may vary depending on molecular weight, formulation with additives and processing. Some classes of copolymers, such as polyurethanes and polyanhydrides, as well as composite blends, have been excluded for space and complexity reasons. bioPET, bioPE and bioPBS are the drop-in bio-variants of PET, PE and PBS, respectively, and can be assumed to have the same materials properties as those of their fossil-derived analogues. <sup>a</sup>Units for gas permeation are ml/m<sup>2</sup>/day/atm for gases and g/m<sup>2</sup>/day for water vapour. HDPE, high-density polyethylene; LDPE, low-density polyethylene; P3HB, poly(3-hydroxybutyrate); P4HB, poly(4-hydroxybutyrate); PBAT, polybutylene adipate-co-terephthalate; PBS, polybutylene succinate; PCL, polycaprolactone; PEF, polyethylene furanoate; PET, polyethylene terephthalate; PGA, polyglycolic acid; PLA, polylactic acid; PP, polypropylene; PS, polystyrene; PVA, polyvinyl alcohol; PVC, polyvinylchloride;  $T_g$ , glass transition temperature;  $T_m$ , melting temperature.

Table S2 | Large-volume producers of bioplastics

| Polymer                                           | Company                       | Location            | Capacity (tonnes per year) | Year of operation | Comments and planned capacities (tonnes per year)                        |
|---------------------------------------------------|-------------------------------|---------------------|----------------------------|-------------------|--------------------------------------------------------------------------|
| PLA <sup>1,6,18</sup>                             | NatureWorks (PTT and Cargill) | USA                 | 150,000                    | 2002              | >75,000 in Thailand by 2024                                              |
| PLA <sup>1,6,19</sup>                             | Corbion and Total             | Thailand            | 75,000                     | 2019              | >100,000 in France by 2024                                               |
| PLA <sup>20</sup>                                 | BBCA Group                    | China               | 40,000                     | 2020              | 700,000 by 2023                                                          |
| PBS <sup>21</sup>                                 | PTT MCC Biochem               | Thailand and Japan  | 20,000                     | 2017              | Uses 50% bio-based succinic acid and 50% petro-based butanediol          |
| PBS <sup>21,22</sup>                              | BASF and Corbion              | Spain               | 10,000                     | 2014              |                                                                          |
| PBS <sup>23</sup>                                 | Hexing Chemical               | China               | 10,000                     | 2009              |                                                                          |
| PHA <sup>14</sup>                                 | Tianjin GreenBio Materials    | China               | 10,000                     | NA                |                                                                          |
| PHA <sup>24</sup>                                 | Danimer Scientific            | USA                 | 9,000                      | 2019              | 30,000 by 2022, 113,000 by 2024                                          |
| PHAs <sup>24</sup>                                | RWDC Industries               | Singapore and USA   | 5,000                      | 2015              | 25,000 per year by 2023                                                  |
| P3HB-4HB <sup>25</sup>                            | CheilJedang                   | South Korea and USA | 5,000                      | 2021              | Relaunch of Metabolix technology                                         |
| PHAs <sup>24</sup>                                | Bio-On                        | Italy               | 1,000                      | NA                | Bankrupt                                                                 |
| PHBV <sup>21,14</sup>                             | Tianan                        | China               | 2,000                      | NA                | Solvent-free process                                                     |
| PBAT <sup>1,26</sup>                              | BASF                          | Germany             | 74,000                     | 1990              | Fossil-based polymer                                                     |
| PBAT <sup>26,27</sup>                             | Jinhui Zhaolong High          | China               | 20,000                     | NA                |                                                                          |
| bioPE <sup>21,28</sup>                            | Braskem "I'm Green"           | Brazil              | 200,000                    | 2010              | 260,000 by 2023                                                          |
| bioPP <sup>29</sup>                               | Neste and Borealis            | Belgium             | NA                         | NA                |                                                                          |
| bioPET <sup>30</sup>                              | Virent and Coca-Cola          | USA                 | NA                         | 2014              |                                                                          |
| bio- <i>para</i> -xylene for bioPET <sup>31</sup> | Gevo                          | USA                 | NA                         | NA                |                                                                          |
| bioPET <sup>26,2</sup>                            | Coca-Cola                     | USA                 | NA                         | NA                | Made from bio-based ethylene glycol and fossil-derived terephthalic acid |
| PEF <sup>21,32</sup>                              | Avantium                      | Netherlands         | NA                         | NA                | 5,000t of FDCA per year by 2023                                          |
| PEF <sup>33</sup>                                 | Corbion                       | Netherlands         | NA                         | NA                | Fermentation process for FDCA                                            |
| PEF <sup>32,34</sup>                              | SULZER                        | Switzerland         | NA                         | NA                | Ring-Opening Polymerization                                              |
| Bio-Nylon-6,6 <sup>35</sup>                       | Genomatica                    | USA                 | NA                         | NA                | Bio-Caprolactam                                                          |
| Starch-based polymers <sup>26</sup>               | Novamont                      | Italy               | 150,000                    | NA                | 85% Starch, the rest fossil-derived                                      |
| Cellulose <sup>36</sup>                           | VTT                           | Finland             | NA                         | NA                | Films                                                                    |
| Cellulose <sup>37</sup>                           | Stora Enso                    | Finland             | NA                         | NA                | Foams                                                                    |

NA, not available. P3HB, poly(3-hydroxybutyrate); P4HB, poly(4-hydroxybutyrate); PBAT, polybutylene adipate-*co*-terephthalate; PBS, polybutylene succinate; PE, polyethylene; PEF, polyethylene furanoate; PET, polyethylene terephthalate; PHA, polyhydroxyalkanoates; PHBH, poly(3-hydroxybutyrate-*co*-3-hydroxyhexanoate); PHBV, poly(3-hydroxybutyrate-*co*-3-hydroxyvalerate); PLA, polylactic acid; PP, polypropylene.

## References

1. Künkel, A. *et al.* Polymers, Biodegradable. in *Ullmann's Encyclopedia of Industrial Chemistry* 1–29 (2016).
2. Lamberti, F. M., Román-Ramírez, L. A. & Wood, J. Recycling of Bioplastics: routes and benefits. *J. Polym. Environ.* **28**, 2551–2571 (2020).
3. Harding, K. G., Dennis, J. S., von Blottnitz, H. & Harrison, S. T. L. Environmental analysis of plastic production processes: Comparing petroleum-based polypropylene and polyethylene with biologically-based poly- $\beta$ -hydroxybutyric acid using life cycle analysis. *J. Biotechnol.* **130**, 57–66 (2007).
4. Chanda, M. & Roy, S. K. *Plastics Technology Handbook*. Taylor & Francis (2006).
5. Rosenboom, J.-G., Hohl, D. K., Fleckenstein, P., Storti, G. & Morbidelli, M. Bottle-grade Polyethylene Furanoate from Ring-Opening Polymerisation of Cyclic Oligomers. *Nat. Commun.* **9**, 2701 (2018).
6. Jem, K. J. & Tan, B. The development and challenges of poly(lactic acid) and poly(glycolic acid). *Adv. Ind. Eng. Polym. Res.* **3**, 60–70 (2020).
7. Siracusa, V., Lotti, N., Munari, A. & Dalla, M. Poly(butylene succinate) and poly(butylene succinate-co-adipate) for food packaging applications: Gas barrier properties after stressed treatments. *Polym. Degrad. Stab.* **119**, 35–45 (2015).
8. Mitsubishi Chemical Corporation. *Biodegradable Polymer BioPBS*. [https://www.m-chemical.co.jp/en/products/departments/mcc/sustainable/product/1201025\\_7964.html](https://www.m-chemical.co.jp/en/products/departments/mcc/sustainable/product/1201025_7964.html)
9. Ben Halima, N. Poly(vinyl alcohol): review of its promising applications and insights into biodegradation. *RSC Adv.* **6**, 39823–39832 (2016).
10. Labet, M. & Thielemans, W. Synthesis of polycaprolactone: a review. *Chem. Soc. Rev.* **38**, 3484–3504 (2009).
11. Ikada, Y. & Tsuji, H. Biodegradable polyesters for medical and ecological applications. *Macromol. Rapid Commun.* **21**, 117–132 (2000).
12. De Jong, E., Dam, M. A., Sipos, L. & Gruter, G. J. M. Furandicarboxylic acid (FDCA), A versatile building block for a very interesting class of polyesters. *ACS Symposium Series* (ed. Smith, P.) vol. 1105 1–13 (ACS, 2012).
13. Burgess, S. K., Karvan, O., Johnson, J. R., Kriegel, R. M. & Koros, W. J. Oxygen sorption and transport in amorphous poly (ethylene furanoate). *Polymer (Guildf)*. **55**, 4748–4756 (2014).
14. Plackett, D. & Siró, I. Polyhydroxyalkanoates (PHAs) for food packaging. in *Multifunctional and Nanoreinforced Polymers for Food Packaging* 498–526 (Elsevier, 2011).
15. Meereboer, K. W., Misra, M. & Mohanty, A. K. Review of recent advances in the biodegradability of polyhydroxyalkanoate (PHA) bioplastics and their composites. *Green Chem.* **22**, 5519–5558 (2020).
16. Utsunomia, C., Ren, Q. & Zinn, M. Poly(4-Hydroxybutyrate): Current State and Perspectives. *Front. Bioeng. Biotechnol.* **8**, 257 (2020).
17. Nakajima, H., Dijkstra, P. & Loos, K. The recent developments in biobased polymers toward general and engineering applications: Polymers that are upgraded from biodegradable polymers, analogous to petroleum-derived polymers, and newly developed. *Polymers (Basel)*. **9**, 523 (2017).
18. Business Wire. *NatureWorks Announces Key Milestones for Global Manufacturing Expansion with New 75kTpa Facility for Producing Ingeo Biopolymer in Thailand*. <https://www.natureworkslc.com/News-and-Events/Press-Releases/2021/2021-06-02-Thailand-Ingeo-PLA-plant-announcement> (2021).
19. Total Corbion PLA. *Total Corbion PLA enters engineering stage for new 100 kTpa PLA plant in Grandpuits, France*. <https://www.total-corbion.com/news/total-corbion-pla-enters-engineering-stage-for-new-100-ktpa-pla-plant-in-grandpuits-france/> (2021).
20. Shuhei Yamada, Y. F. China aims to go as big in bioplastics as it did in solar panels. *Nikkei Asia* <https://asia.nikkei.com/Spotlight/Environment/China-aims-to-go-as-big-in-bioplastics-as-it-did-in-solar-panels> (2021).
21. Chen, J. Global Markets and Technologies for Bioplastics. *bcc Research Report*

- Code: PLS050E 1–231 (2019).
22. BASF. *Succinity produces first commercial quantities of biobased succinic acid*. <https://www.basf.com/fi/en/media/news-releases/2014/03/p-14-0303-ci.html> (2014).
  23. Xu, J. & Guo, B. Poly(butylene succinate) and its copolymers: research, development and industrialization. *Biotechnol. J.* **5**, 1149–1163 (2010).
  24. Tullo, A. H. Will the biodegradable plastic PHA finally deliver? *Chem. Eng. News* <https://cen.acs.org/business/biobased-chemicals/biodegradable-plastic-PHA-finally-deliver/99/i22> (2021).
  25. European Bioplastics. *Member portrait: CJ Europe*. <https://www.european-bioplastics.org/member-portrait-cj-europe/> (2021).
  26. Aeschelmann, F. & Carus, M. Industry Report - Biobased Building Blocks and Polymers in the World: Capacities, Production, and Applications—Status Quo and Trends Towards 2020. 154–159 (2015).
  27. Biodegradable Products Institute. *Jinhui Zhaolong High Technology Co., Ltd.* <https://products.bpiworld.org/companies/jinhui-zhaolong-high-technology-co-ltd>
  28. Braskem. *Braskem invests US\$61 million to increase biopolymer production*. <https://www.braskem.com.br/usa/news-detail/braskem-invests-us61-million-to-increase-biopolymer-production> (2021).
  29. NESTE. *Borealis producing certified renewable polypropylene from Neste's renewable propane at own facilities in Belgium*. <https://www.neste.com/releases-and-news/circular-economy/borealis-producing-certified-renewable-polypropylene-nestes-renewable-propane-own-facilities-belgium> (2020).
  30. Virent. Virent BioFormPX® paraxylene used for world's first pet plastic bottle made entirely from plant-based material. <https://www.virent.com/news/virent-bioformpx-paraxylene-used-for-worlds-first-pet-plastic-bottle-made-entirely-from-plant-based-material/> (2015).
  31. Bioplastics magazine. *Gevo supplies renewable para-xylene to Toray for production of bio-PET*. <https://www.bioplasticsmagazine.com/en/news/meldungen/Gevo-supplies-px.php> (2014).
  32. Loos, K. *et al.* A Perspective on PEF Synthesis, Properties, and End-Life. *Front. Chem.* **8**, 585 (2020).
  33. Corbion. *The future of plastics is biobased*. <http://www.corbion.com/bioplastics/fdca>.
  34. Sulzer. *Shaping the future of polyesters*. <https://www.sulzer.com/en/shared/applications/polyethylene-furanote-pef>.
  35. Schilling, C. & Weiss, S. A Roadmap for Industry to Harness Biotechnology for a More Circular Economy **60**, 9–11 (2021).
  36. VTT. *Advances in cellulose-based food packaging material move to testing phase of industrial production*. <https://www.vttresearch.com/en/news-and-ideas/advances-cellulose-based-food-packaging-material-move-testing-phase-industrial> (2021).
  37. Stora Enso. *A world of possibilities with a bio-based foam for packaging*. <https://www.storaenso.com/en/products/bio-based-materials/cellulose-foam>.
